# Supplementary material for: Serum Magnesium Levels in Preterm Infants Are Higher Than Adult Levels: A Systematic Literature Review and Meta-Analysis
Source: MDPI journal article supplement (doi:10.3390/nu9101125), 2017-10-16
Supplement: s1 [file s1]

**Table S1.** Studies reporting magnesium levels in healthy pregnant women with no magnesium supplementation during pregnancy

| Study                | Population (n)               | Gestation, weeks (range or mean $\pm$ SD) | Sample and Timing                                           | Reported Magnesium Level, mean $\pm$ SD, mmol/L | Range, mmol/L |
|----------------------|------------------------------|-------------------------------------------|-------------------------------------------------------------|-------------------------------------------------|---------------|
| Adam 2001 [31]       | Healthy pregnant women (20)  | 35–40                                     | Venous blood plasma; Before onset of labor                  | 0.70 $\pm$ 0.06                                 | –             |
| Adekanle 2014 [32]   | Healthy pregnant women (75)  | 20–42                                     | Blood serum; At recruitment (during gestation)              | 0.73 $\pm$ 0.14                                 | 0.40–1.10     |
| Al-Jameil 2017 [54]  | Healthy pregnant women (40)  | 31.17 $\pm$ 5.33                          | Blood serum; At recruitment (during gestation)              | 0.80 $\pm$ 0.14                                 | –             |
| Apostol 2010 [33]    | Healthy pregnant women (16)  | Unspecified                               | Blood serum; Unspecified (during gestation)                 | 0.59 $\pm$ 0.04 *                               | –             |
| Asemi 2015 [55]      | Healthy pregnant women (35)  | 24–28                                     | Blood serum; At recruitment (during gestation)              | 0.67 (0.14)                                     | –             |
| Borekci 2009 [34]    | Healthy pregnant women (16)  | 33.82 $\pm$ 1.50                          | Blood serum; After overnight fast (during gestation)        | 0.76 $\pm$ 0.02                                 | 0.74–0.78     |
| Cruikshank 1979 [35] | Healthy pregnant women (11)  | 38.3                                      | Venous blood serum; 2–12 h (mean, 8) before delivery        | 0.68 $\pm$ 0.05                                 | –             |
|                      | Healthy pregnant women (11)  | 38.3                                      | Venous blood serum; At delivery                             | 0.54 $\pm$ 0.05                                 | –             |
| Enaruna 2013 [36]    | Healthy pregnant women (160) | 24–26                                     | Venous blood serum; At recruitment (during gestation)       | 0.73 $\pm$ 0.10                                 | –             |
|                      | Healthy pregnant women (160) | >34                                       | Venous blood serum; At delivery                             | 0.69 $\pm$ 0.23                                 | –             |
| Hallak 1993 [37]     | Healthy pregnant women (21)  | 28.2 $\pm$ 6.5                            | Blood serum; Unspecified (during gestation)                 | 0.73 $\pm$ 0.08                                 | –             |
| Handwerker 1993 [46] | Healthy pregnant women (26)  | 37.5–42                                   | Venous blood serum; During labor                            | 0.78 $\pm$ 0.02 *                               | –             |
| Jafrin 2014 [56]     | Healthy pregnant women (42)  | $\geq$ 28 weeks                           | Blood serum; Unspecified (during gestation)                 | 0.79 $\pm$ 0.33                                 | –             |
| Jain 2010 [38]       | Healthy pregnant women (50)  | 33.62 $\pm$ 7.83                          | Venous blood serum; Unspecified (during gestation)          | 0.79 $\pm$ 0.13                                 | –             |
| Kanagal 2014 [39]    | Healthy pregnant women (60)  | 38.21 $\pm$ 0.85                          | Venous blood serum; After overnight fast (during gestation) | 0.65 $\pm$ 0.30                                 | –             |
| Katz 2012 [40]       | Healthy pregnant women (80)  | 38.15 $\pm$ 2.19                          | Venous blood serum; Before delivery                         | 0.62 $\pm$ 0.15                                 | –             |
| Khoushabi 2016 [57]  | Healthy pregnant women (60)  | Third trimester (unspecified)             | Blood serum; Third trimester (during gestation)             | 0.78 $\pm$ 0.16                                 | –             |
| Kocylowski 2017 [58] | Healthy pregnant women (64)  | 39.2 $\pm$ 1.3                            | Blood serum; Before delivery                                | 0.73 $\pm$ 0.06                                 | –             |
| Kozielec 2004 [50]   | Healthy pregnant women (75)  | 38–41                                     | Venous blood serum; Immediately after delivery              | 0.89 $\pm$ 0.13                                 | 0.53–1.18     |

|                        |                                                 |                               |                                                               |           |           |
|------------------------|-------------------------------------------------|-------------------------------|---------------------------------------------------------------|-----------|-----------|
| Krachler 1999 [59]     | Healthy pregnant women (29)                     | Mature (unspecified)          | Venous blood serum; Within 20 min of delivery                 | 0.69±0.09 | 0.54–0.94 |
| Lazer 2012 [41]        | Healthy pregnant women (active labor; 40)       | 38±3                          | Venous blood plasma; Before onset of labor                    | 0.54±0.08 | –         |
|                        | Healthy pregnant women (elective C-section; 40) | 37±9                          | Venous blood plasma; Before onset of labor                    | 0.66±0.17 | –         |
| Lukacsı 1991 [47]      | Healthy pregnant women (38)                     | Unspecified                   | Umbilical cord arterial blood serum; During labor             | 0.77±0.07 | –         |
| Makinde 1991 [60]      | Healthy pregnant women (33)                     | Term (unspecified)            | Blood serum; Within 5 min of delivery                         | 0.58±0.09 | –         |
| Marret 2008 [24]       | Healthy pregnant women (176)                    | 23–32                         | Blood serum; At delivery                                      | 0.72±0.15 | –         |
| McGuinness 1980 [51]   | Healthy pregnant women (14)                     | ≥37                           | Venous blood serum; At delivery                               | 0.69±0.03 | –         |
| Nabouli 2016 [61]      | Healthy pregnant women (80)                     | 24–28                         | Venous blood serum; At recruitment (during gestation)         | 0.92±0.2  | –         |
| Newman 1957 [42]       | Healthy pregnant women (27)                     | Third trimester (unspecified) | Blood serum; Third trimester (during gestation)               | 0.74      | 0.52–0.87 |
|                        | Healthy pregnant women (27)                     | Unspecified                   | Blood serum; At delivery                                      | 0.71      | 0.38–0.87 |
| Nishiyama 1985 [52]    | Healthy pregnant women (28)                     | 37–41                         | Venous blood serum; At delivery                               | 0.79±0.08 | –         |
| Owusu Darkwa 2017 [62] | Healthy pregnant women (30)                     | >30                           | Venous blood serum; At recruitment (during gestation)         | 0.76±0.14 | –         |
| Schauberger 1979 [63]  | Healthy pregnant women (115)                    | 36–42                         | Venous blood serum; Within 2 min of delivery                  | 0.66±0.19 | –         |
| Schulpis 2010 [48]     | Healthy pregnant women (16)                     | 37–41 (vaginal delivery)      | Blood serum; Beginning of labor                               | 0.81±0.09 | 0.54–0.95 |
|                        | Healthy pregnant women (14)                     | 37–41 (C-section)             | Blood serum; Beginning of labor                               | 0.81±0.04 | 0.74–0.90 |
|                        | Healthy pregnant women (16)                     | 37–41 (vaginal delivery)      | Blood serum; At end of delivery                               | 0.69±0.03 | 0.66–0.74 |
|                        | Healthy pregnant women (14)                     | 37–41 (C-section)             | Blood serum; At end of delivery                               | 0.80±0.02 | 0.74–0.82 |
| Sun 1990 [53]          | Healthy pregnant women (80)                     | Unspecified                   | Venous blood serum; At delivery                               | 0.86±0.21 | –         |
|                        | Healthy pregnant women (63)                     | Unspecified                   | Venous blood serum; At delivery                               | 0.90±0.16 | –         |
| Tabrizi 2014 [43]      | Healthy pregnant women (162)                    | Third trimester (unspecified) | Venous blood serum; End of third trimester (during gestation) | 0.86±0.12 | –         |
| Tavana 2013 [44]       | Healthy pregnant women (52)                     | 18–22                         | Venous blood serum; Unspecified (during gestation)            | 0.95±0.18 | –         |
|                        | Healthy pregnant women                          | 30–35                         | Venous blood serum; Unspecified (during                       | 0.90±0.26 | –         |

|                   |                              |                    |                                             |                   |           |
|-------------------|------------------------------|--------------------|---------------------------------------------|-------------------|-----------|
|                   | women (52)                   |                    | gestation)                                  |                   |           |
| Uludag 2014 [45]  | Healthy pregnant women (100) | 28–33              | Blood serum; Unspecified (during gestation) | 0.74 <sup>†</sup> | 0.62–0.86 |
| Vobecky 1982 [49] | Healthy pregnant women (550) | Term (unspecified) | Venous blood serum; During labor            | 0.68±0.13         | –         |

\* standard error of the mean; <sup>†</sup> median. SD: standard deviation. Bold indicates inclusion in the meta-analysis. Magnesium concentrations reported in non-SI units have been converted to mmol/L as follows: mg/dL × 0.411; mEq/L × 0.5

**Table S2.** Studies reporting magnesium levels in newborns with no magnesium supplementation during pregnancy

| Study                | Population, gestational age (range or mean±SD) (n)           | Sample and Timing                              | Reported Magnesium Level, mean±SD, mmol/L | Range, mmol/L          |
|----------------------|--------------------------------------------------------------|------------------------------------------------|-------------------------------------------|------------------------|
|                      |                                                              | Umbilical cord blood (CB)                      |                                           |                        |
| Borekci 2009 [34]    | Preterm infants, 33.82±1.50 weeks (16)                       | CB; At delivery                                | 0.83±0.34                                 | –                      |
| Cruikshank 1979 [35] | Term infants, mean 38.3 weeks (8)                            | CB arterial serum; At delivery                 | 0.76±0.09                                 | –                      |
|                      | Term infants, mean 38.3 weeks (11)                           | CB venous serum; At delivery                   | 0.75±0.09                                 | –                      |
| Elizabeth 2008 [75]  | Preterm infants, <37 weeks; <2.5 kg (59)                     | CB; Within 5 min of delivery                   | 0.67±0.13                                 | 0.41–0.90              |
|                      | Term infants, >37 weeks; <2.5 kg (192)                       | CB; Within 5 min of delivery                   | 0.71±0.09                                 | 0.41–0.90              |
|                      | Term infants, >37 weeks; >2.5kg (247)                        | CB; Within 5 min of delivery                   | 0.81±0.08                                 | 0.49–0.99              |
| Fenton 2011 [76]     | Preterm infants, 23–27 weeks (48)                            | CB serum; At delivery                          | 0.79±0.07                                 | 0.65–0.94 <sup>†</sup> |
|                      | Preterm infants, 28–31 weeks (127)                           | CB serum; At delivery                          | 0.79±0.10                                 | 0.58–0.99 <sup>†</sup> |
|                      | Preterm infants, 32–34 weeks (193)                           | CB serum; At delivery                          | 0.76±0.08                                 | 0.60–0.92 <sup>†</sup> |
|                      | Preterm infants, 35–36 weeks (120)                           | CB serum; At delivery                          | 0.76±0.09                                 | 0.58–0.93 <sup>†</sup> |
|                      | Term infants, >36 weeks (53)                                 | CB serum; At delivery                          | 0.77±0.08                                 | 0.63–0.92 <sup>†</sup> |
| Handwerker 1993 [46] | Term infants, 37.5–42 weeks (23)                             | CB venous serum; At delivery                   | 0.76±0.02 *                               | 0.70–0.74 <sup>†</sup> |
|                      | Term infants, 37.5–42 weeks (38)                             | CB venous serum; At delivery                   | 0.72±0.01 *                               | 0.70–0.78 <sup>†</sup> |
| Hillman 1977 [77]    | Preterm infants, 31–36 weeks (9)                             | CB serum; At delivery                          | 0.81±0.07 <sup>†</sup>                    | 0.62–1.33              |
|                      | Term infants, >36 weeks (9)                                  | CB serum; At delivery                          | 0.78±0.02 <sup>†</sup>                    | 0.72–0.89              |
| Katz 2012 [40]       | Term infants, 38.15±2.19 weeks (80)                          | CB arterial serum; At delivery                 | 0.67±0.12                                 | –                      |
|                      | Term infants, 38.15±2.19 weeks (80)                          | CB venous serum; At delivery                   | 0.64±0.12                                 | –                      |
| Khoushabi 2016 [57]  | Unspecified (60)                                             | CB serum; Before delivery (unspecified)        | 0.78±0.16                                 | –                      |
| Kocylowski 2017 [58] | Infants, ≥34 weeks (64)                                      | CB venous serum; Immediately after delivery    | 0.73±0.07                                 | –                      |
| Kozielec 2004 [50]   | Term infants, 38–41 weeks (72)                               | CB venous serum; Immediately after delivery    | 0.97±0.16                                 | 0.53–1.46              |
| Krachler 1999 [59]   | Mature infants, unspecified (29)                             | CB serum; At delivery                          | 0.71±0.09                                 | –                      |
| Lazer 2012 [41]      | Late preterm and term infants, 38±3 weeks (active labor; 40) | CB arterial plasma; Immediately after delivery | 0.72±0.10                                 | –                      |
|                      | Late preterm and term infants, 38±3 weeks (active labor; 40) | CB venous plasma; Immediately after delivery   | 0.62±0.09                                 | –                      |
|                      | Infants, 37±9 weeks (elective C-section; 40)                 | CB arterial plasma; Immediately after delivery | 0.61±0.11                                 | –                      |
|                      | Infants, 37±9 weeks (elective C-section; 40)                 | CB venous plasma; Immediately after delivery   | 0.67±0.14                                 | –                      |
| Lukacs 1991 [47]     | Unspecified (38)                                             | CB arterial serum; During labor                | 0.81±0.03                                 | –                      |
|                      | Unspecified (38)                                             | CB venous serum; During labor                  | 0.85±0.05                                 | –                      |
| Makinde 1991 [60]    | Term infants, unspecified (33)                               | CB serum; At delivery of placenta              | 0.62±0.06                                 | –                      |

|                                                             |                                                     |                                                         |             |             |
|-------------------------------------------------------------|-----------------------------------------------------|---------------------------------------------------------|-------------|-------------|
| <b>Marret 2008 [24]</b>                                     | Preterm infants, 23–32 weeks (157)                  | CB venous; At delivery                                  | 0.80 §      | 0.34–2.82   |
| <b>McGuinness 1980 [51]</b>                                 | Term infants, ≥37 weeks (14)                        | CB arterial serum; At delivery of placenta              | 0.74±0.04   | –           |
|                                                             | Term infants, ≥37 weeks (14)                        | CB venous serum; At delivery of placenta                | 0.74±0.03   | –           |
| <b>Mehta 2007 [78]</b>                                      | Preterm infants, <32 weeks (7)                      | CB arterial blood; At delivery                          | 0.96±0.12   | –           |
|                                                             | Preterm infants, 32–34 weeks (8)                    | CB arterial blood; At delivery                          | 0.88±0.11   | –           |
|                                                             | Late preterm and term infants, >35 weeks (7)        | CB arterial blood; At delivery                          | 0.85±0.09   | –           |
| Newman 1957 [42]                                            | Unspecified (21)                                    | CB serum; At delivery                                   | 0.78        | 0.64–0.84   |
| <b>Nishiyama 1985 [52]</b>                                  | Term infants, 37–41 weeks (26)                      | Mixed CB venous-arterial blood; At delivery             | 0.82±0.11   | –           |
| Rudnicki 1991 [79]                                          | Term infants, 37–39 weeks (13)                      | CB arterial blood; At delivery                          | 0.77 §      | 0.65–0.85 † |
| <b>Schauberger 1979 [63]</b>                                | Term infants, 36–42 weeks (79)                      | CB arterial serum; At delivery                          | 0.70±0.07   | –           |
|                                                             | Term infants, 36–42 weeks (115)                     | CB venous serum; At delivery                            | 0.71±0.19   | –           |
| <b>Schulpis 2010 [48]</b>                                   | Term infants, 37–41 weeks, vaginal delivery (16)    | CB serum; Within 3–4 min of delivery                    | 0.81±0.04   | 0.78–0.86   |
|                                                             | Term infants, 37–41 weeks, scheduled C-section (14) | CB serum; Within 3–4 min of delivery                    | 0.80±0.02   | 0.77–0.82   |
| <b>Speich 1992 [80]</b>                                     | Term infants, 39.5±1.39 weeks (66)                  | CB venous plasma; At delivery                           | 0.85±0.08   | –           |
| Stigson 1997 [81]                                           | Preterm infants, 24–32 weeks (59)                   | CB serum; At delivery                                   | 0.81        | 0.32–1.28   |
| <b>Sun 1990 [53]</b>                                        | Unspecified (80)                                    | CB venous serum; At delivery                            | 0.90±0.24   | –           |
|                                                             | Unspecified (63)                                    | CB venous serum; At delivery                            | 0.78±0.11   | –           |
| <b>Tabrizi 2014 [43]</b>                                    | Infants, third trimester (162)                      | CB serum; Before delivery of placenta                   | 0.82±0.11   | –           |
| <b>Vobecky 1992 [49]</b>                                    | Term infants, unspecified (505)                     | CB mixed venous-arterial blood; At delivery             | 0.68±0.13   | –           |
| <b>Serum magnesium levels during the first days of life</b> |                                                     |                                                         |             |             |
| <b>Basu 2012 [74]</b>                                       | Preterm infants, 22–32 weeks (186)                  | Serum within 24 hours after delivery                    | 1.10±0.3    | –           |
| Hillman 1977 [77]                                           | Preterm infants, 31–36 weeks (8)                    | Blood serum by heel stick; At 48±2 hours after delivery | 0.94±0.04 † | 0.77–1.10   |
|                                                             | Term infants, >36 weeks, C-section (8)              | Blood serum by heel stick; At 48±2 hours after delivery | 0.94±0.03 † | 0.78–1.08   |
|                                                             | Preterm infants, 31–36 weeks (9)                    | Blood serum by heel stick; At 7 days after delivery     | 0.99±0.04 † | 0.71–1.13   |
|                                                             | Term infants, >36 weeks, C-section (9)              | Blood serum by heel stick; At 7 days after delivery     | 0.90±0.03 † | 0.76–1.05   |
| <b>Marret 2008 [24]</b>                                     | Preterm infants, 23–32 weeks (157)                  | Blood by venipuncture; At 24 hours after delivery       | 0.85 §      | 0.40–2.50   |
| <b>Mehta 2007 [78]</b>                                      | Preterm infants, <32 weeks (7)                      | Blood; At 36–48 hours after delivery                    | 0.97±0.12   | –           |
|                                                             | Preterm infants, 32–34 weeks (8)                    | Blood; At 36–48 hours after delivery                    | 0.89±0.11   | –           |
|                                                             | Term infants, >35 weeks (7)                         | Blood; At 36–48 hours after delivery                    | 0.87±0.09   | –           |
| Rudnicki 1991 [79]                                          | Term infants, 37–39 weeks (13)                      | Blood serum by heel stick; At 24 hours after delivery   | 0.72 §      | 0.65–0.86 † |
| <b>Schauberger 1979 [63]</b>                                | Term infants, 36–42 weeks (115)                     | Blood serum by heel stick; At 24 hours after delivery   | 0.72±0.10   | –           |
| <b>Vobecky 1982 [49]</b>                                    | Term infants, unspecified (453)                     | Capillary blood; At day 5 of life                       | 0.79±0.14   | –           |

\* standard error of the mean; † standard error; ‡ 95% confidence interval; § median; || number of samples. C-section: cesarean delivery; SD: standard deviation. Bold indicates inclusion in the meta-analysis. Magnesium concentrations reported in non-SI units have been converted to mmol/L as follows: mg/dL × 0.411; mEq/L × 0.5

**Table S3.** Studies reporting magnesium levels in newborns with magnesium supplementation during pregnancy

| Study                               | Population, gestation (range or mean±SD) (n); indication for treatment                 | Magnesium Dosage                                                                                                                                                                                                                                                                                                                                                                     | Sample and Timing                           | Reported Magnesium Level, mean±SD, mmol/L | Range, mmol/L |
|-------------------------------------|----------------------------------------------------------------------------------------|--------------------------------------------------------------------------------------------------------------------------------------------------------------------------------------------------------------------------------------------------------------------------------------------------------------------------------------------------------------------------------------|---------------------------------------------|-------------------------------------------|---------------|
| <b>Umbilical cord blood (CB)</b>    |                                                                                        |                                                                                                                                                                                                                                                                                                                                                                                      |                                             |                                           |               |
| <b>Boriboonthirunsarn 2012 [86]</b> | Infants, 32–41 weeks (36); Mothers with preeclampsia                                   | Loading dose of 4 g of MgSO <sub>4</sub> followed by continuous intravenous infusion of 2 g/h (total dose ranged from 5.5–34.5 g, mean 14.4 g)                                                                                                                                                                                                                                       | CB venous serum; Immediately after delivery | 1.80±0.30                                 | 1.40–2.90     |
| <b>Katz 2012 [40]</b>               | Late preterm and term infants, 37.72±2.56 weeks (43); Mothers with severe preeclampsia | Received magnesium sulfate [MgSO <sub>4</sub> ], unspecified regimen                                                                                                                                                                                                                                                                                                                 | CB venous serum; At delivery                | 1.36±0.36                                 | –             |
|                                     | Late preterm and term infants, 37.72±2.56 weeks (43); Mothers with severe preeclampsia | Received magnesium sulfate [MgSO <sub>4</sub> ], unspecified regimen                                                                                                                                                                                                                                                                                                                 | CB arterial serum; At delivery              | 1.37±0.35                                 | –             |
| <b>Marret 2008 [24]</b>             | Preterm infants, 23–32 weeks (88); Preterm neuroprotection                             | One-time administration of 4 g of MgSO <sub>4</sub> infused over 2030 min                                                                                                                                                                                                                                                                                                            | CB; At delivery                             | 0.99 *                                    | 0.21–2.89     |
| <b>Morag 2016 [88]</b>              | Preterm infants, <32 weeks (157); Preterm neuroprotection or preeclampsia              | Intravenous loading dose of 5 g of MgSO <sub>4</sub> over 30 min, followed by maintenance infusion of 2 g/h                                                                                                                                                                                                                                                                          | CB serum;                                   | 1.44±0.36                                 | 0.66–2.34     |
| <b>Palatnik 2015 [87]</b>           | Preterm infants, 30.1±2.9 weeks (548); Preterm neuroprotection                         | Loading dose of 6 g infused for 20–30 min, followed by maintenance infusion of 2 g/h for ≤12 hours. Infusion was discontinued if delivery was not imminent, with the intent of resuming it again for recurrent preterm labor or anticipated delivery <34 weeks gestation. Another loading dose was administered at resumption if ≥6 h passed since MgSO <sub>4</sub> discontinuation | CB; At delivery                             | 1.30±0.45                                 | –             |
| <b>Rudnicki 1991 [79]</b>           | Term infants, 37–39 weeks (12); Mothers with pregnancy-induced hypertension            | 48-hour intravenous infusion of MgCl <sub>2</sub> : 50 mmol during the first 24 h followed by 12 mmol during the second 24 h. Starting day 3, received 15 mmol each day until 1 day after delivery                                                                                                                                                                                   | CB arterial; At delivery                    | 0.80 *                                    | 0.70–0.91 †   |
| <b>Vahabi 2016 [89]</b>             | Preterm infants, 20–37 weeks (43); Mothers with preeclampsia                           | Primary 15 g injection of MgSO <sub>4</sub> (10 g intramuscularly; 5 g intravenously), followed by maintenance dose of 5 g intramuscularly every 6 h                                                                                                                                                                                                                                 | CB serum; Immediately after delivery        | 1.59±0.55                                 | –             |

|                                    |                                                                             |                                                                                                                                                                                                    |                                                              |           |             |
|------------------------------------|-----------------------------------------------------------------------------|----------------------------------------------------------------------------------------------------------------------------------------------------------------------------------------------------|--------------------------------------------------------------|-----------|-------------|
|                                    | Term infants, ≥38 weeks (43); Mothers with preeclampsia                     | Primary 15 g injection of MgSO <sub>4</sub> (10 g intramuscularly; 5 g intravenously), followed by maintenance dose of 5 g intramuscularly every 6 h                                               | CB serum; Immediately after delivery                         | 1.42±0.45 | –           |
|                                    |                                                                             | <b>Serum magnesium levels during the first days of life</b>                                                                                                                                        |                                                              |           |             |
| <b>Basu 2012 [74]</b>              | Preterm infants, 24–32 weeks (289); Preterm neuroprotection                 | Loading dose of 6 g infused over 30 min, followed by a maintenance infusion of 2 g/h until time of delivery                                                                                        | Blood serum; Within 24 hours after delivery                  | 1.75±0.5  | –           |
| <b>Borja-Del-Rosario 2014 [83]</b> | Preterm infants, 24–32 weeks (192); Preterm neuroprotection                 | Loading dose of 4–6 g infused over 30 min, followed by a maintenance infusion of 1–2 g/h                                                                                                           | Blood serum; Within 24 hours after delivery                  | 1.52±0.43 | –           |
| <b>Marret 2008 [24]</b>            | Preterm infants, 23–32 weeks (157); Preterm neuroprotection                 | One-time administration of 4 g of MgSO <sub>4</sub> infused over 20–30 minutes                                                                                                                     | Blood by venipuncture; At 24 hours after delivery            | 0.98 *    | 0.71–2.52   |
| Rudnicki 1991 [79]                 | Term infants, 37–39 weeks (12); Mothers with pregnancy-induced hypertension | 48-hour intravenous infusion of MgCl <sub>2</sub> : 50 mmol during the first 24 h followed by 12 mmol during the second 24 h. Starting day 3, received 15 mmol each day until 1 day after delivery | Blood serum by heel stick; At 24 hours after delivery        | 0.89 *    | 0.74–1.01 † |
| <b>Vahabi 2016 [89]</b>            | Preterm infants, 20–37 weeks (43); Mothers with preeclampsia                | Primary 15 g injection of MgSO <sub>4</sub> (10 g intramuscularly; 5 g intravenously), followed by maintenance dose of 5 g intramuscularly every 6 h                                               | Blood serum by peripheral vessel; At 24 hours after delivery | 1.35±0.42 | –           |
|                                    | Term infants, ≥38 weeks (43); Mothers with preeclampsia                     | Primary 15g injection of MgSO <sub>4</sub> (10 g intramuscularly; 5 g intravenously), followed by maintenance dose of 5 g intramuscularly every 6 h                                                | Blood serum by peripheral vessel; At 24 hours after delivery | 1.22±0.36 | –           |

\* median; † 95% confidence interval. C-section: cesarean delivery; SD: standard deviation. Bold indicates inclusion in the meta-analysis. Magnesium concentrations reported in non-SI units have been converted to mmol/L as follows: mg/dL × 0.411; mEq/L × 0.5
